# Supplementary material
Source: Copernicus journal article supplement (doi:10.5194/hess-30-3425-2026)
Supplement: Supplementary file 1 [file hess-30-3425-2026-supplement.pdf]

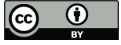

*Supplement of*

## **Symbolic regression-based regionalization of baseflow separation parameter using catchment-scale characteristics**

**Yongen Lin et al.**

*Correspondence to:* Dagang Wang ([wangdag@mail.sysu.edu.cn](mailto:wangdag@mail.sysu.edu.cn))

The copyright of individual parts of the supplement might differ from the article licence.

1 **S1. Derivation of SEC based on mass balance relationships**

2 For a two-component streamflow composition scenario, in which total streamflow is  
3 composed of a rapid surface/shallow subsurface flow component and a slower baseflow  
4 component, the mass balance relationships can be expressed as:

$$SEC_t Q_t = SEC_{s,t} S_t + SEC_{b,t} B_t , \quad ( S1 )$$

$$Q_t = S_t + B_t , \quad ( S2 )$$

5 where  $Q_t$  and  $SEC_t$  denote the total streamflow and the corresponding environmental  
6 tracer concentration at time step  $t$ , respectively.  $S_t$  and  $B_t$  are the surface flow and  
7 baseflow contributions at time step  $t$ .  $SEC_{s,t}$  and  $SEC_{b,t}$  are the tracer concentration of  
8 surface flow and baseflow. Combining equations S1 and S2 to solve for  $SEC_t$ , we obtain:

$$\widehat{SEC}_t = \frac{SEC_{s,t}(Q_t - B_t) + SEC_{b,t}B_t}{Q_t} . \quad ( S3 )$$

9

10 **S2. Diebold–Mariano (DM) test**

11 To evaluate whether the predictive performance of different formulas is  
12 statistically distinguishable, we applied the Diebold–Mariano (DM) test (Diebold and  
13 Mariano, 1995). The DM test compares predictive accuracy based on the loss differential  
14 between two competing models. First, the loss differential at time  $t$  is defined as

$$d_t = L(e_{A,t}) - L(e_{B,t}) , \quad ( S4 )$$

15 where  $e_{A,t}$  and  $e_{B,t}$  denote the prediction errors of formulas A and B at time  $t$ ,  
16 respectively, and  $L(\cdot)$  is the loss function. In this study, the squared error was used to test  
17 for the significant differences between different  $R^2$  values:

$$L(e_t) = e_t^2 . \quad ( S5 )$$

18 The DM test statistic is then computed as

$$DM = \frac{\bar{d}}{\sqrt{\widehat{var}(\bar{d})}} , \quad ( S6 )$$

19 where  $\bar{d}$  is the mean loss differential and  $\widehat{var}(\bar{d})$  is the long-run variance of  $\bar{d}$ . Under the  
20 null hypothesis of equal predictive accuracy, the DM statistic asymptotically follows a  
21 standard normal distribution. A two-sided test was used to determine whether the  
22 predictive performance of two SR formulas differed significantly at the level of 0.01.

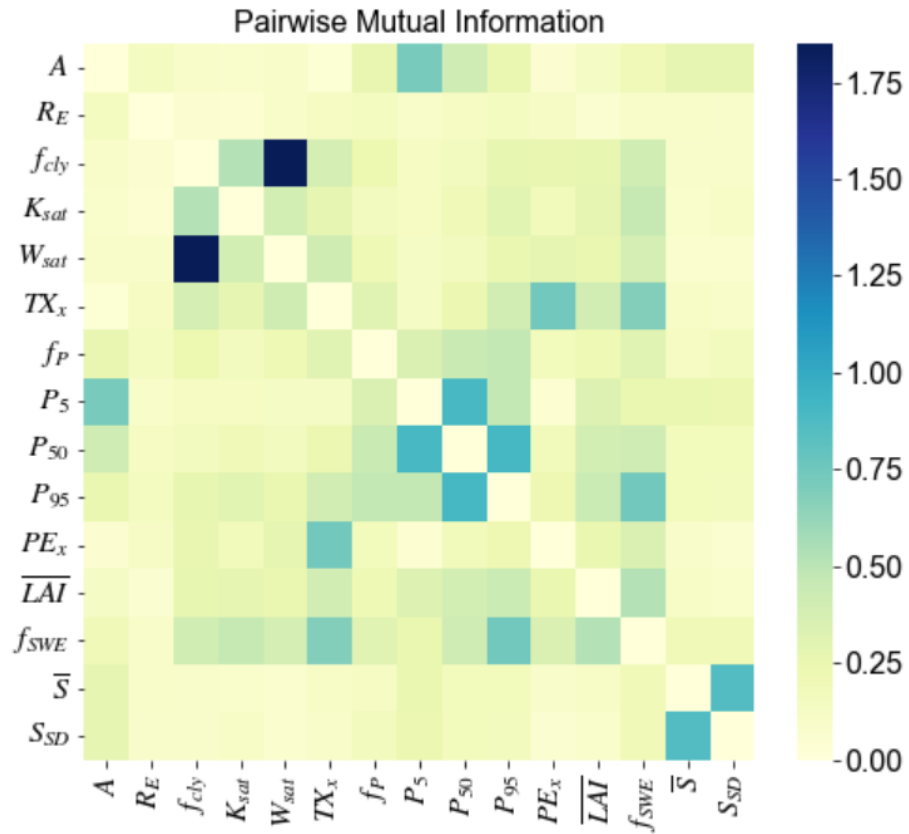

23  
24

**Figure S1.** Mutual information matrix of candidate predictor variables.

25  
26  
27  
28

**References**

Diebold, F.X., Mariano, R.S., 1995. Comparing Predictive Accuracy. *Journal of Business & Economic Statistics*, 13(3): 253-263. DOI:10.1080/07350015.1995.10524599
